# Supplementary material for: Comparison of various calcium antagonist on vasospastic angina: a systematic review
Source: HighWire-hosted journal article supplement (doi:10.1136/openhrt-2022-002179), 2023-01-01
Supplement: openhrt-2022-002179supp001_data_supplement.pdf [file openhrt-2022-002179supp001_data_supplement.pdf]

### Supplementary Materials

**Table 1. Study quality assessment of risk of bias using Newcastle-Ottawa scale**

| Study year        | Selection | Comparability | Outcome | Total score | AHRQ interpretation |
|-------------------|-----------|---------------|---------|-------------|---------------------|
| Gao et al., 2015  | 2         | 0             | 3       | 5           | Poor quality        |
| Park et al., 2016 | 3         | 1             | 3       | 7           | Good quality        |

**Table 2. Study quality assessment of risk of bias using Revised Cochrane**

|                       | <b>Risk of bias arising from the randomization process</b> | Risk of bias due to deviations from the intended interventions | Missing outcome data | Risk of bias in measurement of the outcome | Risk of bias in selection of the reported result | Overall risk of bias |
|-----------------------|------------------------------------------------------------|----------------------------------------------------------------|----------------------|--------------------------------------------|--------------------------------------------------|----------------------|
| Kook et al., 2020     | Low                                                        | Low                                                            | Low                  | Low                                        | High                                             | High                 |
| Higuma et al., 2010   | Low                                                        | Some concerns                                                  | Low                  | Some concerns                              | Some concerns                                    | Some concerns        |
| Shin et al., 2014     | Low                                                        | Low                                                            | Low                  | Low                                        | High                                             | High                 |
| Oikawa Y et al., 2009 | Low                                                        | Some concerns                                                  | Low                  | High risk                                  | Some concern                                     | High                 |

**Table 3. Description of the studies in this systematic review**

| Author year       | Country | Study design                              | Study population                                                              | Number of participants, age, gender          | Study objective                                                                                            | Research instrument                                                                                                                |
|-------------------|---------|-------------------------------------------|-------------------------------------------------------------------------------|----------------------------------------------|------------------------------------------------------------------------------------------------------------|------------------------------------------------------------------------------------------------------------------------------------|
| Gao et al., 2015  | China   | Retrospective cohort study                | Participants admitted to Suizhou Central Hospital                             | $N = 5$ , age 45-62 (mean age: 50), 80% male | To determine the effect of diltiazem in treating atrioventricular block caused by coronary spasm           | Holter ECG, coronary angiography, clinical symptoms                                                                                |
| Kook et al., 2020 | Korea   | Prospective Randomized double-blind trial | Participants admitted to Korea University Anam Hospital, Guro Hospital, Ansan | $N = 48$ , age 35-80 years, 66.67% male      | To determine percent changes in coronary artery spasm, the quality of life, changes in blood pressure, and | Seattle Angina Questionnaire, electrocardiography, computerized quantitative analyzer (to measure the diameter of artery), enzyme- |

|                               |       |                                                                      |                                                                                                                                                                                |                                                                                                                                                                                   |                                                                                                                                                                        |                                                                                        |
|-------------------------------|-------|----------------------------------------------------------------------|--------------------------------------------------------------------------------------------------------------------------------------------------------------------------------|-----------------------------------------------------------------------------------------------------------------------------------------------------------------------------------|------------------------------------------------------------------------------------------------------------------------------------------------------------------------|----------------------------------------------------------------------------------------|
|                               |       |                                                                      | Hospital,<br>and<br>Severance<br>hospital                                                                                                                                      |                                                                                                                                                                                   | inflammator<br>y markers<br>and lipid<br>profiles                                                                                                                      | linked<br>immunosorbent<br>assay (ELISA)                                               |
| Park et<br>al.,<br>2016       | Korea | Observatio<br>nal<br>retrospectiv<br>e study (non<br>randomized<br>) | Participants<br>admitted to<br>Cardiovascu<br>lar Center of<br>Korea<br>University<br>Guro<br>Hospital,<br>Seoul, South<br>Korea with<br>typical and<br>atypical<br>chest pain | $N = 2741$ ,<br>divided to<br>2 groups,<br>Diltiazem<br>only group<br>842, and<br>dual group<br>Diltiazem<br>and nitrate<br>1899.<br>All the<br>study<br>participant<br>were male | To observe<br>the<br>cumulative<br>clinical end<br>point<br>(mortality,<br>PCI, MI,<br>cerebrovascu<br>lar accident,<br>repeat CAG,<br>and MACE,<br>within 5<br>years. | Quantitative<br>coronary<br>angiography<br>(QCA),<br>acetylcholine<br>provocation test |
| Higu<br>ma et<br>al.,<br>2010 | Japan | Randomize<br>d control<br>trial (RCT)                                | 37 patients<br>with VSA<br>from 8<br>institutions<br>in Aomori                                                                                                                 | 37 subjects<br>were<br>randomly<br>assigned to<br>Nifedipine                                                                                                                      | The<br>effectiveness<br>of nifedipine<br>compared to<br>twice daily                                                                                                    | 24 hours<br>ambulatory ECG,<br>blood pressure<br>and heart rate<br>assessment,         |

|                   |       |                          |                                                                                                                                |                                                                                                                                          |                                                                                                                |                                                                   |
|-------------------|-------|--------------------------|--------------------------------------------------------------------------------------------------------------------------------|------------------------------------------------------------------------------------------------------------------------------------------|----------------------------------------------------------------------------------------------------------------|-------------------------------------------------------------------|
|                   |       |                          | Prefecture between January 2007 and December 2008.                                                                             | group N=20 (60% male) and Diltiazem N=17 (47.1% male)                                                                                    | diltiazem in VSA attack.                                                                                       | statistical analysis, acetylcholine test during arteriography.    |
| Shin et al., 2014 | Korea | Randomized control trial | Subjects were recruited from 10 teaching hospitals in South Korea. All subjects were newly diagnosed with VSA within 3 months. | 71 patients from 10 hospitals were screened, 50 patients met the study criteria were randomly to receive the drugs. Both male and female | To assess the effectiveness and side effects of amlodipine compared to cilostazol therapy in uncontrolled VSA. | Ergonovine induced coronary artery spasm angiography, 12 lead ECG |

|                           |       |                              |                                                                                                                                        |                                                                                                                                                                              |                                                                                                                                               |                                                                                                                                    |
|---------------------------|-------|------------------------------|----------------------------------------------------------------------------------------------------------------------------------------|------------------------------------------------------------------------------------------------------------------------------------------------------------------------------|-----------------------------------------------------------------------------------------------------------------------------------------------|------------------------------------------------------------------------------------------------------------------------------------|
|                           |       |                              |                                                                                                                                        | were<br>equally<br>distributed<br>in the<br>amlodipin<br>e group.                                                                                                            |                                                                                                                                               |                                                                                                                                    |
| Oikawa<br>et al.,<br>2009 | Japan | Randomized non-blinded trial | Outpatient patients registered in three facilities specializing in cardiovascular medicine in Tokyo from January 2007 to December 2008 | N= 28,<br>(30,<br>but 2<br>dropped<br>out<br>because of<br>increasing<br>attacks and<br>hypotension)<br>; 4 more<br>patients<br>dropped<br>out<br>because of<br>insufficient | To compare<br>nifedipine<br>and<br>benidipine<br>effectiveness<br>in reducing<br>frequency of<br>angina<br>attacks and<br>nitrates<br>usages. | Holter ECG,<br>coronary<br>angiography<br>(intracoronary injection of<br>acetylcholine<br>or<br>ergonovine),<br>symptom<br>diaries |

|  |  |  |  |                                                                                  |  |  |
|--|--|--|--|----------------------------------------------------------------------------------|--|--|
|  |  |  |  | efficacy of<br>the<br>medication<br>,<br>mean age<br>64.6, 9<br>male/5<br>female |  |  |
|--|--|--|--|----------------------------------------------------------------------------------|--|--|

**Table 4. Comparison of Various Calcium Antagonist on Vasospastic Angina**

| Author            | Types of CCB evaluated | Frequency of symptomatic episodes                                                                                                                                                                                                                                          | adverse effects and other results                                                                                             | Percentage change of artery diameter                                                                      |
|-------------------|------------------------|----------------------------------------------------------------------------------------------------------------------------------------------------------------------------------------------------------------------------------------------------------------------------|-------------------------------------------------------------------------------------------------------------------------------|-----------------------------------------------------------------------------------------------------------|
| Gao et al., 2015  | Diltiazem              | After followed up for a period ranging from 1 month to 2 years, none reported recurrence of chest pain, chest tightness, hypotension, or adverse drug reactions.                                                                                                           | NR                                                                                                                            | NR                                                                                                        |
| Kook et al., 2020 | Diltiazem              | Significant improvement of quality of life based on Seattle Angina Questionnaire from baseline to 12-weeks after treatments across three groups with changes $5.2 \pm 8.5$ ( $p=0.0002$ ). However, no significant difference between baseline and each group. Significant | No significant differences in inflammatory cytokine levels from baseline during the 12 weeks across three groups ( $p>0.05$ ) | Greatest in Diltiazem group. Percent changes in diameter from the baseline provocation test for Diltiazem |

|                   |                   |                                                                                                                                          |                                                                                            |                                                                                                                                                                                                           |
|-------------------|-------------------|------------------------------------------------------------------------------------------------------------------------------------------|--------------------------------------------------------------------------------------------|-----------------------------------------------------------------------------------------------------------------------------------------------------------------------------------------------------------|
|                   |                   | improvement of systolic blood pressure reduction from baseline after 12-weeks treatments across three groups ( $p<0.0001$ ).             |                                                                                            | group is $67.8\%\pm 12.8\%$                                                                                                                                                                               |
| Park et al., 2016 | Diltiazem (n=811) | Angiographic chest pain characteristic post PSM 521(64.2) ( $p=0.354$ )<br><br>Recurrent angina up to 5 years 8.3 post PSM ( $p=0.276$ ) | Incidence of AV block 276 (34.0) ( $p<0.001$ )<br><br>5 years total death 0.0 ( $p<0.05$ ) | Quantitative coronary angiography: diameter of narrowing post PSM $70.4\pm 12.5$ ( $p=0.144$ )<br><br>Diffuse spasm in coronary angiography (narrowing $>30\text{mm}$ ) post PSM 697 (85.9) ( $p=0.943$ ) |

|                     |                      |                                                                                                                                                                                                                                                       |                                                                                                                                                                                                                                                                                                                                                                                                                    |    |
|---------------------|----------------------|-------------------------------------------------------------------------------------------------------------------------------------------------------------------------------------------------------------------------------------------------------|--------------------------------------------------------------------------------------------------------------------------------------------------------------------------------------------------------------------------------------------------------------------------------------------------------------------------------------------------------------------------------------------------------------------|----|
| Higuma et al., 2010 | Nifedipine CR 1x40mg | Frequency of angina baseline value per week<br>$2.56 \pm 3.16$ ( $p=0.671$ )<br><br>Frequency was reduced significantly to 0.41, 0.24, 0.36 by the 4 <sup>th</sup> , 8 <sup>th</sup> and 12 <sup>th</sup> weeks consecutively ( $p<0.05$ vs baseline) | Five-point scale efficacy showed slight improvement in both groups without significant difference<br><br>The heart rate was found to be significantly increased in the 8 <sup>th</sup> week of treatment by $7.2 \pm 8.9$ beats/min<br><br>2 patients had their treatment switched to diltiazem due to palpitation in 4 days and 4 weeks<br><br>There were no ECG changes after 12 weeks treatment in all patients | NR |
|                     | Diltiazem R 2x100mg  | Frequency of angina baseline value per week<br>$2.71 \pm 2.57$ ( $p=0.671$ )                                                                                                                                                                          | One patient switched to Nifedipine due to the recurrence of angina episode within 4 weeks.                                                                                                                                                                                                                                                                                                                         | NR |

|                   |                    |                                                                                                                                                                                                                                                          |                                                                                                                                                                                                                                       |                                                                                                                        |
|-------------------|--------------------|----------------------------------------------------------------------------------------------------------------------------------------------------------------------------------------------------------------------------------------------------------|---------------------------------------------------------------------------------------------------------------------------------------------------------------------------------------------------------------------------------------|------------------------------------------------------------------------------------------------------------------------|
|                   |                    | Frequency was reduced significantly to 0.55, 0.32, 0.27 by the 4 <sup>th</sup> 8 <sup>th</sup> and 12 <sup>th</sup> weeks consecutively (p<0.05 vs. baseline)                                                                                            | Another patient experienced recurrence at 8 weeks but resolved with additional Nicorandil drug.                                                                                                                                       |                                                                                                                        |
|                   |                    | No significant difference in between the two drug groups                                                                                                                                                                                                 | In one patient asymptomatic advanced atrioventricular block was detected and switched to nifedipine CR.                                                                                                                               |                                                                                                                        |
| Shin et al., 2014 | Amlodipine 5mg/day | Baseline: $\geq 1$ angina episodes/week<br><br>Change in the frequency of weekly chest pain - $17.6\% \pm 140.1$ ( $-1.9x \pm 0.6$ )<br><br>Change in the total pain intensity $-7.5 \pm 2.7$<br><br>Change in the average pain intensity $-1.1 \pm 0.4$ | Change in glyceryl trinitrate consumption - $0.4 \pm 0.6$<br><br>Headache was the most common adverse events (20%), followed by dizziness (8.3%), palpitation (8.3%), bradycardia (4.2%), chest discomfort (4.2%), GI symptoms (4.2%) | Baseline value: ergonovine induced coronary artery spasm produce >90% narrowing of the artery diameter in angiography, |

|                       |                         |                                                                                                                 |                                                                                                                                |                                                                                                                                                                     |
|-----------------------|-------------------------|-----------------------------------------------------------------------------------------------------------------|--------------------------------------------------------------------------------------------------------------------------------|---------------------------------------------------------------------------------------------------------------------------------------------------------------------|
|                       |                         | Proportion of chest pain free 33.3%                                                                             | One subject had <80% drug adherence                                                                                            | accompanied with ST elevation or depression $\geq 0.1\text{mV}$ found from at least 2 leads. Insignificant diameter stenosis <50% after injection of nitroglycerine |
| Oikawa Y, et al. 2009 | Nifedipine CR 40mg n=15 | Frequency of symptomatic episodes improved by $0.10 \pm 0.40$ per week in the 8 <sup>th</sup> week (p = 0.0002) | Adverse effects found in 1 patient given nifedipine whom experienced excessive drop in blood pressure after the administration | NR                                                                                                                                                                  |

|  |  |  |                                                                                                                                                                                                                     |  |
|--|--|--|---------------------------------------------------------------------------------------------------------------------------------------------------------------------------------------------------------------------|--|
|  |  |  | <p>of the drug.</p> <p>Other results observed by the attending physicians found that 100% of the study participants with Nifedipine CR 40mg were found to have improved subjective symptoms and objective signs</p> |  |
|--|--|--|---------------------------------------------------------------------------------------------------------------------------------------------------------------------------------------------------------------------|--|

NR: not reported
